# Supplementary material
Source: ML conference proceedings conference paper supplement (https://proceedings.neurips.cc/paper_files/paper/2022/hash/13b8d8fb8d05369480c2c344f2ce3f25-Abstract.html)
Supplement: Supplementary file 1 [file 13b8d8fb8d05369480c2c344f2ce3f25-Supplemental-Conference.zip]

Archive with 28 entries (19 files):
- Code/
- Code/data/
- Code/models/
- Code/models/c4_group_cnn.py
- Code/models/FINE-MLP.py
- Code/models/FINE-NICE.py
- Code/models/HyperNet-NICE.py
- Code/models/modules.py
- Code/models/PrediNet.py
- Code/models/resnet.py
- Code/models/RN.py
- Code/models/silu.py
- Code/models/Transformer.py
- Code/README.md
- Code/tasks/
- Code/tasks/cifar100_train_class_id_dict.json
- Code/tasks/omniglot_train_class_id_dict.json
- Code/tasks/transformation.py
- Code/test/
- Code/test/transformation/
- Code/test/transformation/m50/
- Code/test/transformation/m50/FINE-MLP_nonorm_lr0.0005/
- Code/test/transformation/m50/FINE-MLP_nonorm_lr0.0005/run1.txt
- Code/test/transformation/m50/FINE-NICE_nonorm_lr0.0005/
- Code/test/transformation/m50/FINE-NICE_nonorm_lr0.0005/run1.txt
- Code/transformation_train_and_eval.py
- Code/util.py
- appendix-CAMERA-READY.pdf
