# Supplementary material
Source: ML conference proceedings conference paper supplement (https://proceedings.neurips.cc/paper_files/paper/2022/hash/13b8d8fb8d05369480c2c344f2ce3f25-Abstract.html)
Supplement: Supplementary file 1 [file 13b8d8fb8d05369480c2c344f2ce3f25-Supplemental-Conference.zip › Code/models/resnet.py]

import torch
import torch.nn as nn

from functools import partial
from dataclasses import dataclass
from collections import OrderedDict
from silu import SiLU

activation = SiLU
BOTTLENECK = True

#=======================================================================================================================

class ReShape(nn.Module):
    def forward(self, input):
        return input.view(input.size(0), 1, 28, 28)


class Flatten(nn.Module):
    def forward(self, input):
        return input.view(input.size(0), -1)


class UnFlatten(nn.Module):
    def forward(self, input, size=512):
        return input.view(input.size(0), size, 1, 1)

#=======================================================================================================================

class Conv2dAuto(nn.Conv2d):
    def __init__(self, *args, **kwargs):
        super().__init__(*args, **kwargs)
        self.padding = (self.kernel_size[0] // 2, self.kernel_size[1] // 2)  # dynamic add padding based on the kernel_size

conv1x1 = partial(Conv2dAuto, kernel_size=1, bias=False)
conv3x3 = partial(Conv2dAuto, kernel_size=3, bias=False)

class ResidualBlock(nn.Module):
    def __init__(self, in_channels, out_channels):
        super().__init__()
        self.in_channels, self.out_channels = in_channels, out_channels
        self.blocks = nn.Identity()
        self.shortcut = nn.Identity()

    def forward(self, x):
        residual = x
        if self.should_apply_shortcut: residual = self.shortcut(x)
        x = self.blocks(x)
        x += residual
        return x

    @property
    def should_apply_shortcut(self):
        return self.in_channels != self.out_channels


class ResNetResidualBlock(ResidualBlock):
    def __init__(self, in_channels, out_channels, expansion=1, downsampling=1, conv1x1=conv1x1,
                 conv3x3=conv3x3, *args, **kwargs):
        super().__init__(in_channels, out_channels)
        self.expansion, self.downsampling, self.conv1x1, self.conv3x3 = expansion, downsampling, conv1x1, conv3x3
        self.shortcut = nn.Sequential(OrderedDict(
            {
                'conv': nn.Conv2d(self.in_channels, self.expanded_channels, kernel_size=1,
                                  stride=self.downsampling, bias=False),
                'bn': nn.BatchNorm2d(self.expanded_channels)

            })) if self.should_apply_shortcut else None

    @property
    def expanded_channels(self):
        return self.out_channels * self.expansion

    @property
    def should_apply_shortcut(self):
        return self.in_channels != self.expanded_channels

def conv_bn(in_channels, out_channels, conv, *args, **kwargs):
    return nn.Sequential(OrderedDict(
        {'conv': conv(in_channels, out_channels, *args, **kwargs),
         'bn': nn.BatchNorm2d(out_channels)
         }))

class ResNetBasicBlock(ResNetResidualBlock):
    expansion = 1
    def __init__(self, in_channels, out_channels, bottleneck=False, activation=activation, *args, **kwargs):
        super().__init__(in_channels, out_channels, *args, **kwargs)
        if not bottleneck:
            self.blocks = nn.Sequential(
                conv_bn(self.in_channels, self.out_channels, conv=self.conv3x3, bias=False, stride=self.downsampling),
                activation(),
                conv_bn(self.out_channels, self.expanded_channels, conv=self.conv3x3, bias=False),
            )
        else:
            self.blocks = nn.Sequential(
                conv_bn(self.in_channels, self.out_channels, conv=self.conv1x1, bias=False, stride=self.downsampling),
                activation(),
                conv_bn(self.out_channels, self.expanded_channels, conv=self.conv3x3, bias=False),
                activation(),
                conv_bn(self.out_channels, self.expanded_channels, conv=self.conv1x1, bias=False),
            )

#=======================================================================================================================

class EncoderBlock(nn.Module):
    def __init__(self, in_channels, out_channels, activation=activation):
        super(EncoderBlock, self).__init__()
        self.encoder_block = nn.Sequential(nn.Conv2d(in_channels=in_channels, out_channels=out_channels,
                                                     kernel_size=4, stride=2, padding=2),
                                           ResNetBasicBlock(in_channels=out_channels, out_channels=out_channels,
                                                            bottleneck=BOTTLENECK),
                                           )

    def forward(self, x):
        return self.encoder_block(x)

class Encoder(nn.Module):
    def __init__(self, original_channel, base_channel, input_encoded_size):
        super(Encoder, self).__init__()
        self.encoder = nn.Sequential(EncoderBlock(in_channels=original_channel, out_channels=base_channel),
                                     EncoderBlock(in_channels=base_channel, out_channels=base_channel),
                                     EncoderBlock(in_channels=base_channel, out_channels=base_channel),
                                     # EncoderBlock(in_channels=base_channel, out_channels=base_channel),
                                     Flatten(),
                                     # nn.Linear(288, input_encoded_size),
                                     )

    def forward(self, x):
        return self.encoder(x)

#=======================================================================================================================

if __name__ == '__main__':
    dummy = torch.ones((16, 3, 32, 32))
    layer = Encoder(original_channel=dummy.shape[1], base_channel=8, input_encoded_size=128)
    out = layer(dummy)
    print(out.shape)
