# Supplementary material
Source: ML conference proceedings conference paper supplement (https://proceedings.neurips.cc/paper_files/paper/2022/hash/13b8d8fb8d05369480c2c344f2ce3f25-Abstract.html)
Supplement: Supplementary file 1 [file 13b8d8fb8d05369480c2c344f2ce3f25-Supplemental-Conference.zip › Code/models/silu.py]

import torch
from torch import nn

# simply define a silu function
def silu(input):
    '''
    Applies the Sigmoid Linear Unit (SiLU) function element-wise:
        SiLU(x) = x * sigmoid(x)
    '''
    return input * torch.sigmoid(input) # use torch.sigmoid to make sure that we created the most efficient implemetation based on builtin PyTorch functions

# create a class wrapper from PyTorch nn.Module, so
# the function now can be easily used in models
class SiLU(nn.Module):
    '''
    Applies the Sigmoid Linear Unit (SiLU) function element-wise:
        SiLU(x) = x * sigmoid(x)
    Shape:
        - Input: (N, *) where * means, any number of additional
          dimensions
        - Output: (N, *), same shape as the input
    References:
        -  Related paper:
        https://arxiv.org/pdf/1606.08415.pdf
    Examples:
        >>> m = silu()
        >>> input = torch.randn(2)
        >>> output = m(input)
    '''
    def __init__(self):
        '''
        Init method.
        '''
        super().__init__() # init the base class

    def forward(self, input):
        '''
        Forward pass of the function.
        '''
        return silu(input) # simply apply already implemented SiLU
