# Supplementary material
Source: ML conference proceedings conference paper supplement (https://proceedings.neurips.cc/paper_files/paper/2022/hash/13b8d8fb8d05369480c2c344f2ce3f25-Abstract.html)
Supplement: Supplementary file 1 [file 13b8d8fb8d05369480c2c344f2ce3f25-Supplemental-Conference.zip › Code/README.md]

# Functional Indirection Neural Estimator for Better Out-of-distribution Generalization

Code for the paper *Functional Indirection Neural Estimator for Better Out-of-distribution Generalization*.

For example, to reproduce the results for FINE on the translation task using images from CIFAR100, run the following command:
```
python ./transformation_train_and_eval.py --norm_type nonorm --lr 1e-4 --task transformation --m_holdout 50 --epochs 200 --model_name FINE-NICE --transformation_method cifar100-translation --num_train 10000 --num_test 20000 --num_memory 32 --num_memory_layer 4 --encoder c4_group_cnn
```
