# Supplementary material
Source: ML conference proceedings conference paper supplement (https://proceedings.neurips.cc/paper_files/paper/2022/hash/13b8d8fb8d05369480c2c344f2ce3f25-Abstract.html)
Supplement: Supplementary file 1 [file 13b8d8fb8d05369480c2c344f2ce3f25-Supplemental-Conference.zip › Code/util.py]

import logging
from colorlog import ColoredFormatter
import os


ch = logging.StreamHandler()
ch.setLevel(logging.DEBUG)

formatter = ColoredFormatter(
    "%(log_color)s[%(asctime)s] %(message)s",
#    datefmt='%H:%M:%S.%f',
    datefmt=None,
    reset=True,
    log_colors={
        'DEBUG':    'cyan',
        'INFO':     'white,bold',
        'INFOV':    'cyan,bold',
        'WARNING':  'yellow',
        'ERROR':    'red,bold',
        'CRITICAL': 'red,bg_white',
    },
    secondary_log_colors={},
    style='%'
)
ch.setFormatter(formatter)

log = logging.getLogger('rn')
log.setLevel(logging.DEBUG)
log.handlers = []       # No duplicated handlers
log.propagate = False   # workaround for duplicated logs in ipython
log.addHandler(ch)


def check_path(path):
    if not os.path.exists(path):
        os.mkdir(path)
